# Supplementary material for: Diffusion kinetics of gold in TiO2 nanotube arrays for formation of Au@TiO2 nanotube arrays
Source: Royal Society of Chemistry journal article supplement (doi:10.1039/c6ra08801e), 2016-01-01
Supplement: c6ra08801e1.pdf [file c6ra08801e1.pdf]

Supporting Information

Diffusion Kinetics of Gold in TiO<sub>2</sub> Nanotube Arrays for formation of Au@TiO<sub>2</sub> Nanotube  
Arrays

Wanggang Zhang<sup>1,2,3</sup>, Yiming Liu<sup>1,2</sup>, Diaoyu Zhou<sup>1,2</sup>, Jing Wen<sup>1,2</sup>, Liuwei Zheng<sup>1,2</sup>, Wei  
Liang<sup>1,2,\*</sup> and Fuqian Yang<sup>3,\*</sup>

<sup>1</sup> College of Materials Science and Engineering, Taiyuan University of Technology, Taiyuan  
Shanxi 030024, China

<sup>2</sup> Key Laboratory of Interface Science and Engineering in Advanced Materials, Taiyuan  
University of Technology, Ministry of Education, Taiyuan Shanxi 030024, China

<sup>3</sup> Department of Chemical and Materials Engineering, University of Kentucky, Lexington,  
KY 40506, USA

Figure S1 shows SEM images of pure TiO<sub>2</sub> nanotubes arrays prepared by the one-step anodization process and the two-step anodization process, and SEM image of the imprints left on the surface of the Ti sheet after ultrasonication.

Figure S2 shows the EDS analyses of the bottom and upper sides of the Au@TiO<sub>2</sub> nanotubes arrays after heat treatment at 450 °C for 3 hr.

Figure S3 shows SEM images of the bottom side of Au@TiO<sub>2</sub> nanotubes arrays with heat treatment at both 450 and 500 °C for 5 hr.

Figure S4 shows TEM images of Au@TiO<sub>2</sub> nanotubes arrays after heat treatment at 500 °C for three different heating times and the corresponding size distribution of Au nanocrystals.

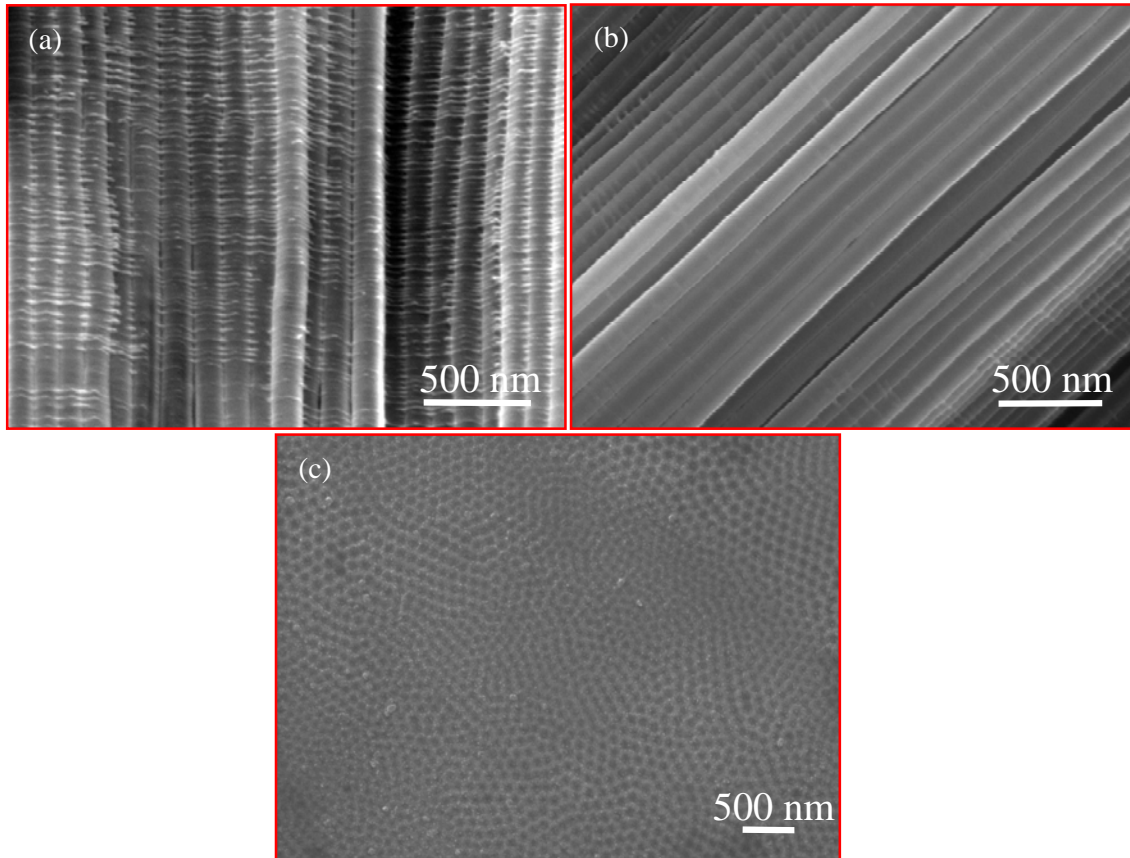

Figure S1. SEM images of pure TiO<sub>2</sub> nanotubes arrays; (A) TiO<sub>2</sub> nanotubes arrays prepared by the one-step anodization process, (b) TiO<sub>2</sub> nanotubes arrays prepared by the two-step anodization process, and (3) SEM image of the imprints left on the surface of the Ti sheet after ultrasonication

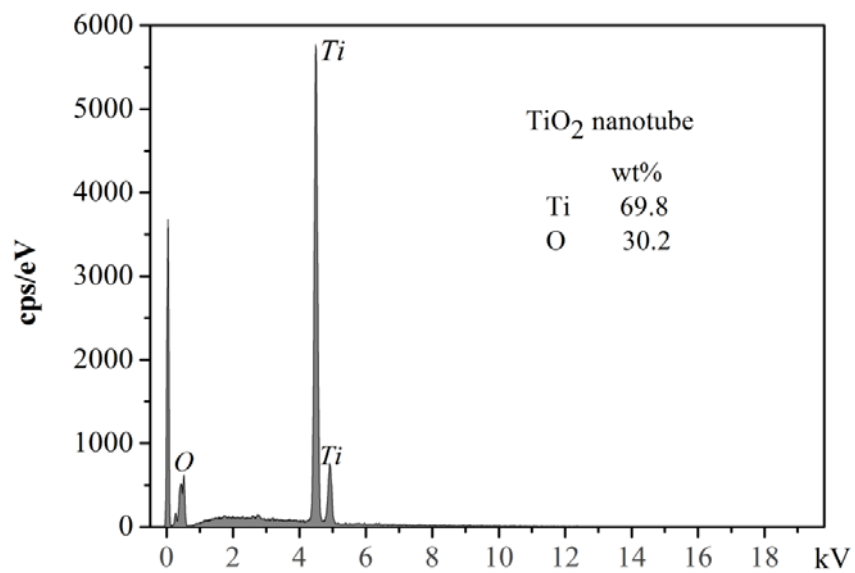

(a)

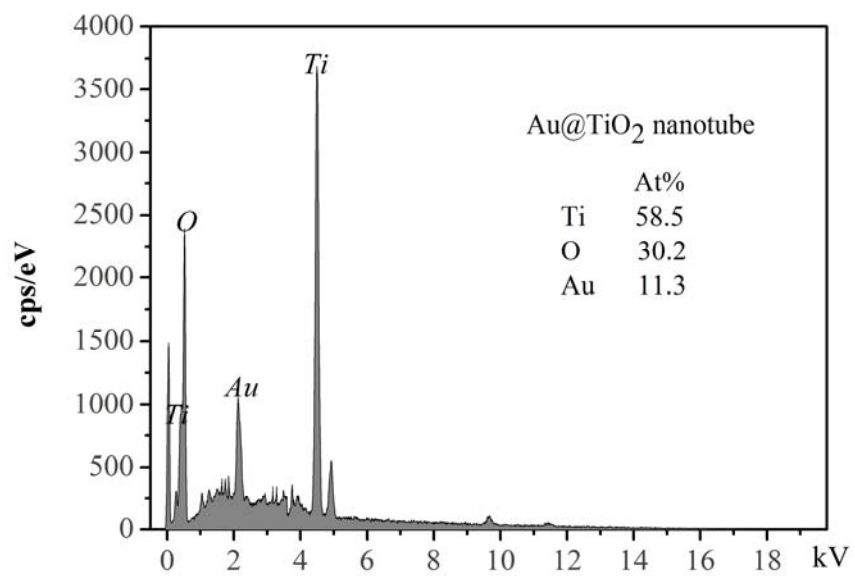

(b)

Figure S2. EDS analysis of  $\text{Au@TiO}_2$  nanotubes arrays after heat treatment at  $450^\circ\text{C}$  for 3 hr; (a) bottom side and (b) upper side

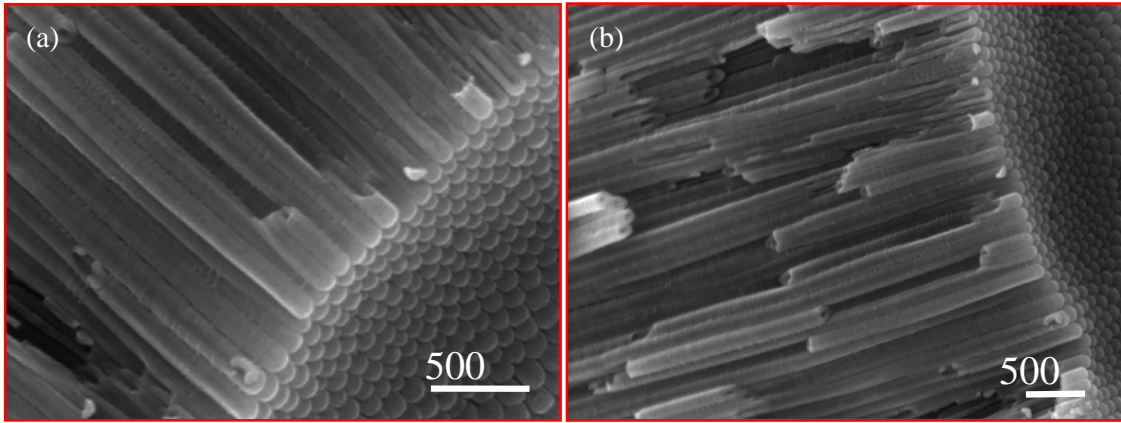

Figure S3. SEM images of the bottom side of Au@TiO<sub>2</sub> nanotubes arrays (a) with heat treatment at 450 °C for 5 hr and (b) with heat treatment at 500 °C for 5 hr

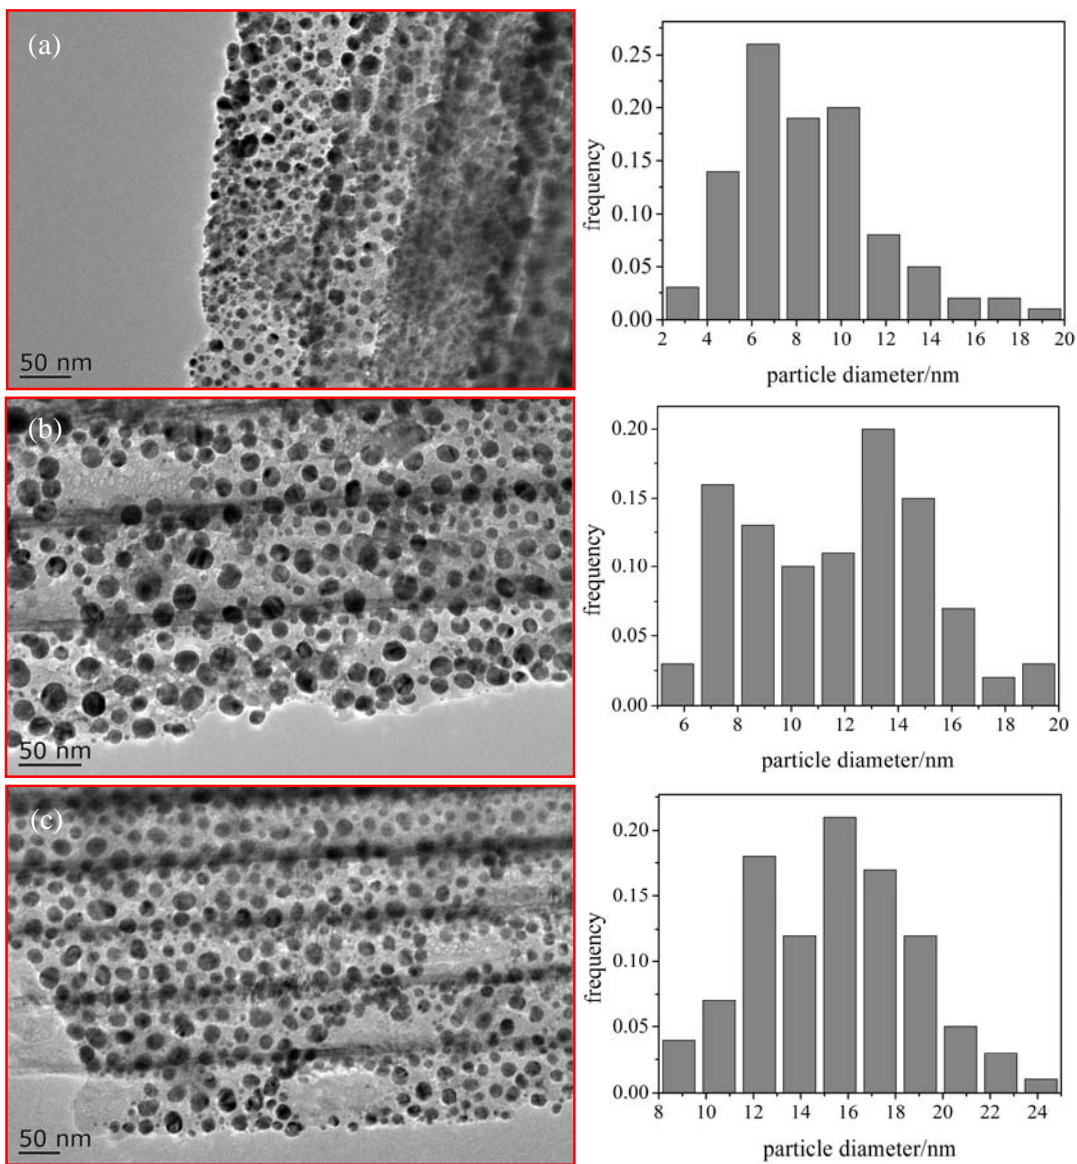

Figure S4. TEM images of Au@TiO<sub>2</sub> nanotubes arrays after heat treatment at 500 °C for three different times and the corresponding size distribution of Au nanocrystals; (a) 1 hr (average size: 8.55 nm), (b) 3 hr (average size: 11.68 nm); (c) 5 hr (average size: 15.53 nm)

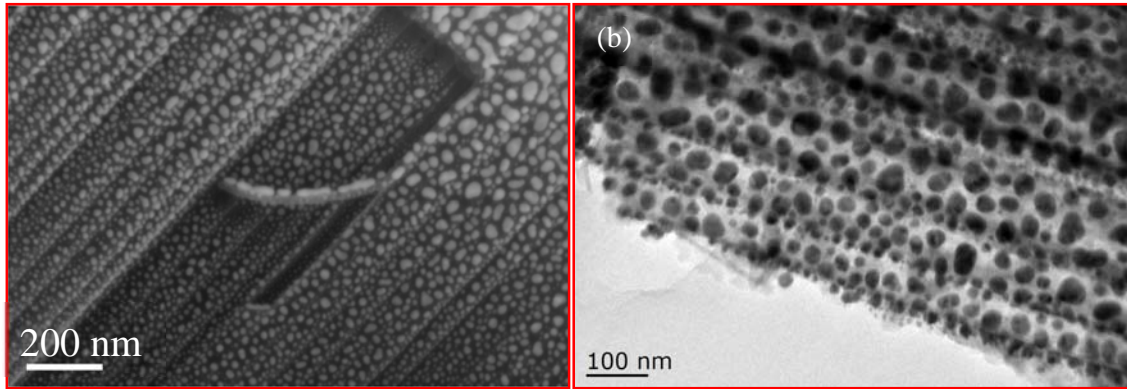

Figure S5 (a) SEM image of Au@TiO<sub>2</sub> nanotubes arrays after heat treatment at 450 °C for 3 hr in argon environment, and (b) TEM image of Au@TiO<sub>2</sub> nanotubes arrays after heat treatment at 450 °C for 3 hr in argon environment
